# Supplementary material
Source: PubMed Central journal article supplement (PMC5492976)
Supplement: NIHMS850641-supplement-1.pdf [file NIHMS850641-supplement-1.pdf]

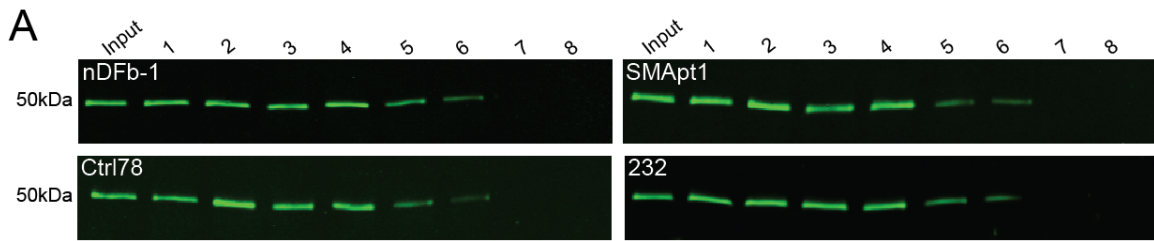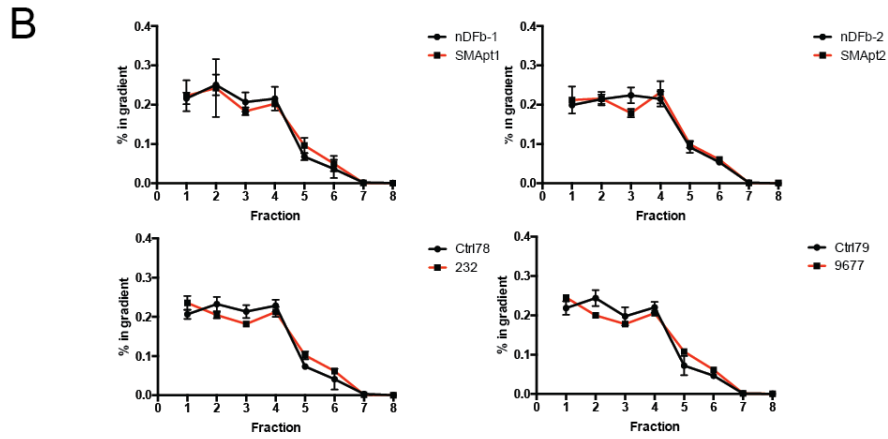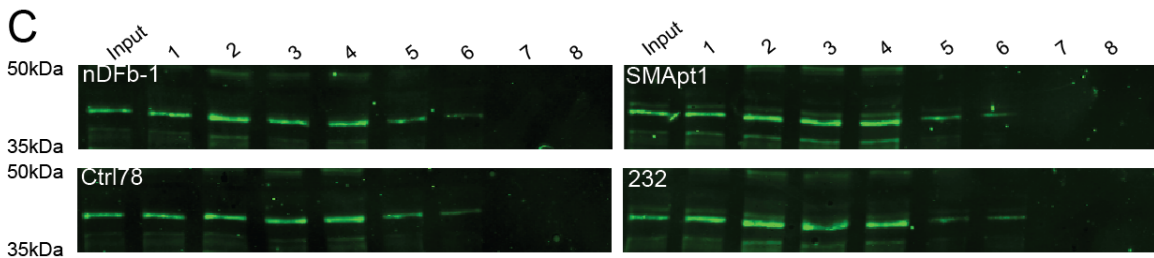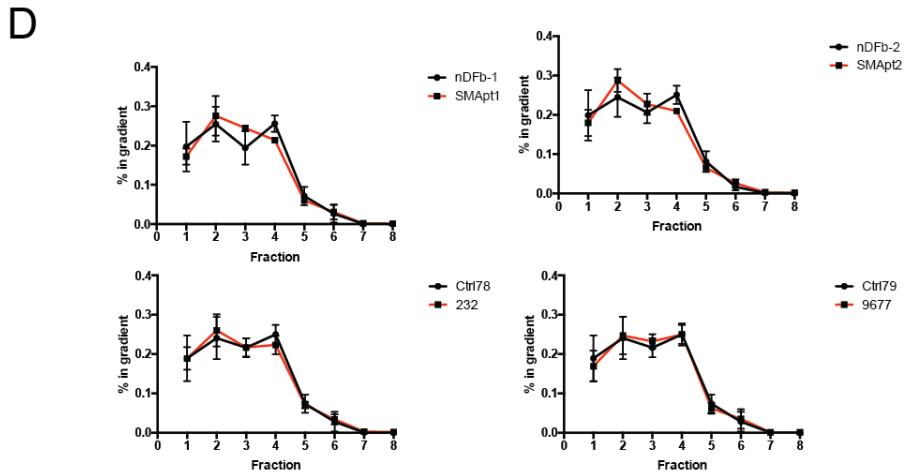

**Supplemental Figure 1. Relates to figure 5.:**

Cytoskeletal proteins show unaltered distributions in SMA fibroblasts relative to controls.

**A.** Cytoplasmic lysates from fibroblasts were fractionated via Optiprep gradient centrifugation and fractions were analyzed for the presence of tubulin by western blot analysis. SMA lysates (SMApt1, 232) shows unaltered distribution of tubulin relative to control fractions (nDFb-1, Ctrl78). **B.** Distributions plotted as enrichment in % of the total signal in all fractions found in one particular fraction. n=3, analyzed by Sidak's multiple comparisons test. Error bars +/- SEM. **C.** Cytoplasmic lysates from fibroblasts were fractionated via Optiprep gradient centrifugation and fractions were analyzed for the presence of actin. SMA lysates shows unaltered distribution of actin relative to control fractions. **D.** Distributions plotted as enrichment in % of the total signal in all fractions found in one particular fraction. n=3, analyzed by Sidak's multiple comparisons test. Error bars +/- SEM.

**A**

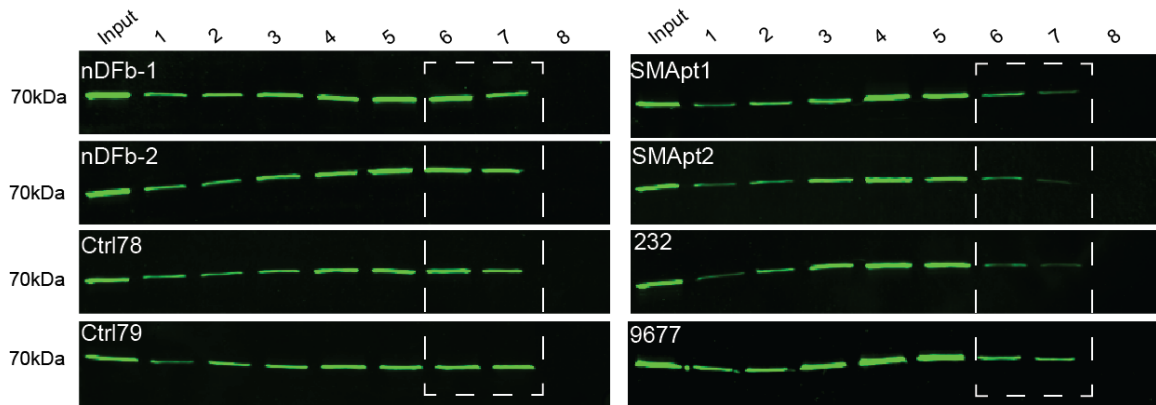

**B**

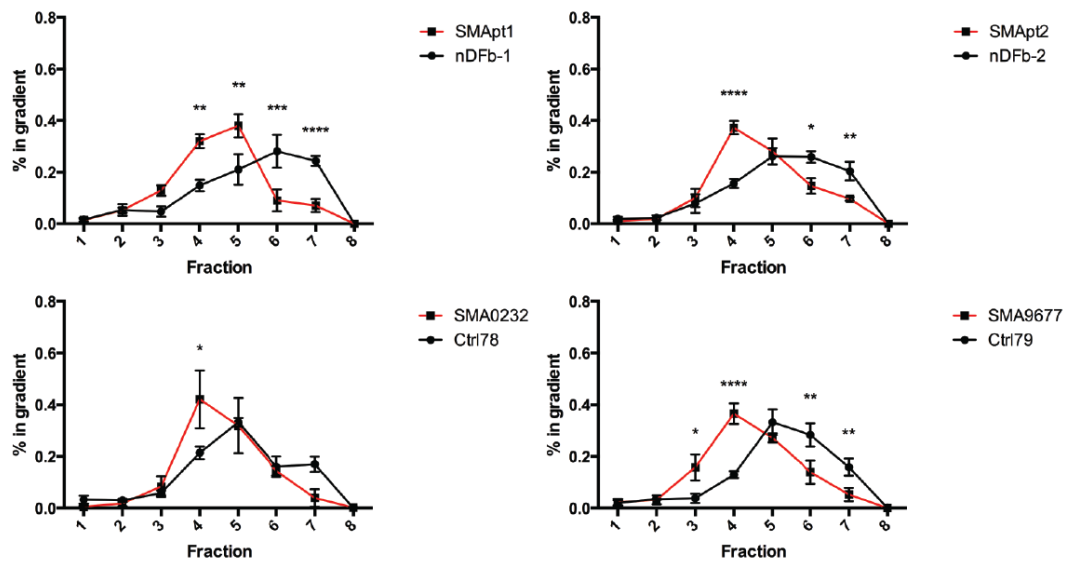

**Supplemental Figure 2. Relates to Figure 5:**

PABPC1 granules show reduced complexity in SMA patient samples. **A.** Cytoplasmic lysates from fibroblasts were subjected to Optiprep gradient centrifugation and fractions were analyzed for the presence of PABPC1. SMA lysates shows altered distribution of PABPC1 complexes relative to control fractions. **B.** Distributions are plotted as enrichment in % of the total signal in all fractions found in one particular fraction. n=3, analyzed by Sidak's multiple comparisons test, \*p<.05, \*\*p<.01., \*\*\*p<.001, \*\*\*\*p<.0001. Error bars +/- SEM.

|                                  |      |
|----------------------------------|------|
| Number of families               | 1    |
| Number of comparisons per family | 6    |
| Alpha                            | 0.05 |

| Tukey's multiple comparisons test | Mean Diff. | 95% CI of diff.   | Significant ? | Summary |
|-----------------------------------|------------|-------------------|---------------|---------|
| No UTR vs. ΔBox UTR               | 0.004453   | -0.5897 to 0.5986 | No            | ns      |
| No UTR vs. ΔZip UTR               | -0.7825    | -1.377 to -0.1883 | Yes           | **      |
| No UTR vs. Full UTR               | -2.899     | -3.432 to -2.366  | Yes           | ****    |
| ΔBox UTR vs. ΔZip UTR             | -0.787     | -1.381 to -0.1928 | Yes           | **      |
| ΔBox UTR vs. Full UTR             | -2.904     | -3.437 to -2.370  | Yes           | ****    |
| ΔZip UTR vs. Full UTR             | -2.117     | -2.650 to -1.583  | Yes           | ****    |

**Supplemental Table 1. Relates to Figure 1D:**

Statistical comparisons for figure 1D. Values for cell body TriFC signals were assessed using a one way ANOVA and Tukey's multiple comparisons test. Test was conducted with 1 family, 6 comparisons per family and an alpha of .05. ns: not significant, \*:  $p < .05$ , \*\*:  $p < .01$ , \*\*\*:  $p < .001$ , \*\*\*\*:  $p < .0001$ .

|                                  |      |
|----------------------------------|------|
| Number of families               | 1    |
| Number of comparisons per family | 6    |
| Alpha                            | 0.05 |

| Tukey's multiple comparisons test | Mean Diff. | 95% CI of diff.    | Significant ? | Summary |
|-----------------------------------|------------|--------------------|---------------|---------|
| No UTR vs. ΔBox UTR               | 0.03454    | -0.2570 to 0.3260  | No            | ns      |
| No UTR vs. ΔZip UTR               | -0.6792    | -0.9707 to -0.3877 | Yes           | ****    |
| No UTR vs. Full UTR               | -1.928     | -2.219 to -1.636   | Yes           | ****    |
| ΔBox UTR vs. ΔZip UTR             | -0.7137    | -1.005 to -0.4222  | Yes           | ****    |
| ΔBox UTR vs. Full UTR             | -1.962     | -2.254 to -1.671   | Yes           | ****    |
| ΔZip UTR vs. Full UTR             | -1.249     | -1.540 to -0.9571  | Yes           | ****    |

**Supplemental Table 2. Relates to Figure 1E:**

Statistical comparisons for figure 1E. Values for axonal TriFC signals were assessed using a one way ANOVA and Tukey's multiple comparisons test. Test was conducted with 1 family, 6 comparisons per family and an alpha of .05. ns: not significant, \*:  $p < .05$ , \*\*:  $p < .01$ , \*\*\*:  $p < .001$ , \*\*\*\*:  $p < .0001$ .



Compare column means (main column effect)

Number of families 1  
 Number of comparisons per family 28  
 Alpha 0.05

| Tukey's multiple comparisons test | Mean Diff. | 95% CI of diff.   | Significant ? | Summary |
|-----------------------------------|------------|-------------------|---------------|---------|
| Ctrl78 vs. Ctrl79                 | -0.1228    | -0.6174 to 0.3718 | No            | ns      |
| Ctrl78 vs. nDFb-1                 | 0.1645     | -0.3301 to 0.6590 | No            | ns      |
| Ctrl78 vs. nDFb-2                 | -0.1168    | -0.6113 to 0.3778 | No            | ns      |
| Ctrl78 vs. SMApt1                 | 0.8463     | 0.3517 to 1.341   | Yes           | ****    |
| Ctrl78 vs. SMApt2                 | 0.9857     | 0.4911 to 1.480   | Yes           | ****    |
| Ctrl78 vs. SMA0232                | 1.01       | 0.5150 to 1.504   | Yes           | ****    |
| Ctrl78 vs. SMA9677                | 1.061      | 0.5660 to 1.555   | Yes           | ****    |
| Ctrl79 vs. nDFb-1                 | 0.2873     | -0.2073 to 0.7818 | No            | ns      |
| Ctrl79 vs. nDFb-2                 | 0.006054   | -0.4885 to 0.5006 | No            | ns      |
| Ctrl79 vs. SMApt1                 | 0.9691     | 0.4745 to 1.464   | Yes           | ****    |
| Ctrl79 vs. SMApt2                 | 1.108      | 0.6139 to 1.603   | Yes           | ****    |
| Ctrl79 vs. SMA0232                | 1.132      | 0.6378 to 1.627   | Yes           | ****    |
| Ctrl79 vs. SMA9677                | 1.183      | 0.6889 to 1.678   | Yes           | ****    |
| nDFb-1 vs. nDFb-2                 | -0.2812    | -0.7758 to 0.2133 | No            | ns      |
| nDFb-1 vs. SMApt1                 | 0.6818     | 0.1872 to 1.176   | Yes           | ***     |
| nDFb-1 vs. SMApt2                 | 0.8212     | 0.3266 to 1.316   | Yes           | ****    |
| nDFb-1 vs. SMA0232                | 0.8451     | 0.3506 to 1.340   | Yes           | ****    |
| nDFb-1 vs. SMA9677                | 0.8962     | 0.4016 to 1.391   | Yes           | ****    |
| nDFb-2 vs. SMApt1                 | 0.963      | 0.4685 to 1.458   | Yes           | ****    |
| nDFb-2 vs. SMApt2                 | 1.102      | 0.6079 to 1.597   | Yes           | ****    |
| nDFb-2 vs. SMA0232                | 1.126      | 0.6318 to 1.621   | Yes           | ****    |
| nDFb-2 vs. SMA9677                | 1.177      | 0.6828 to 1.672   | Yes           | ****    |
| SMApt1 vs. SMApt2                 | 0.1394     | -0.3552 to 0.6340 | No            | ns      |
| SMApt1 vs. SMA0232                | 0.1633     | -0.3313 to 0.6579 | No            | ns      |
| SMApt1 vs. SMA9677                | 0.2143     | -0.2802 to 0.7089 | No            | ns      |

|                     |         |                      |    |    |
|---------------------|---------|----------------------|----|----|
| SMApt2 vs. SMA0232  | 0.02392 | -0.4706 to<br>0.5185 | No | ns |
| SMApt2 vs. SMA9677  | 0.07495 | -0.4196 to<br>0.5695 | No | ns |
| SMA0232 vs. SMA9677 | 0.05102 | -0.4435 to<br>0.5456 | No | ns |

**Supplemental Table 3. Relates to Figure 3B:**

Statistical comparisons for figure 3B. Values for fibroblast TriFC signals were assessed using a two way ANOVA and Tukey's multiple comparisons test. Test was conducted with 1 family, 28 comparisons per family and an alpha of .05. ns: not significant, \*:  $p < .05$ , \*\*:  $p < .01$ , \*\*\*:  $p < .001$ , \*\*\*\*:  $p < .0001$ .

Compare column means (main column effect)

Number of families 1  
 Number of comparisons per family 28  
 Alpha 0.05

| Tukey's multiple comparisons test | Mean Diff. | 95% CI of diff.    | Significant? | Summary |
|-----------------------------------|------------|--------------------|--------------|---------|
| Ctrl78 vs. Ctrl79                 | 0.01659    | -0.1318 to 0.1649  | No           | ns      |
| Ctrl78 vs. nDFb-1                 | 0.004521   | -0.1438 to 0.1529  | No           | ns      |
| Ctrl78 vs. nDFb-2                 | 0.01596    | -0.1324 to 0.1643  | No           | ns      |
| Ctrl78 vs. SMApt1                 | 0.01914    | -0.1292 to 0.1675  | No           | ns      |
| Ctrl78 vs. SMApt2                 | -0.032     | -0.1804 to 0.1164  | No           | ns      |
| Ctrl78 vs. SMA0232                | 0.02831    | -0.1200 to 0.1767  | No           | ns      |
| Ctrl78 vs. SMA9677                | 0.08215    | -0.06621 to 0.2305 | No           | ns      |
| Ctrl79 vs. nDFb-1                 | -0.01207   | -0.1604 to 0.1363  | No           | ns      |
| Ctrl79 vs. nDFb-2                 | 0.0006256  | -0.1490 to 0.1477  | No           | ns      |
| Ctrl79 vs. SMApt1                 | 0.002552   | -0.1458 to 0.1509  | No           | ns      |
| Ctrl79 vs. SMApt2                 | -0.04859   | -0.1969 to 0.09978 | No           | ns      |
| Ctrl79 vs. SMA0232                | 0.01173    | -0.1366 to 0.1601  | No           | ns      |
| Ctrl79 vs. SMA9677                | 0.06556    | -0.08280 to 0.2139 | No           | ns      |
| nDFb-1 vs. nDFb-2                 | 0.01144    | -0.1369 to 0.1598  | No           | ns      |
| nDFb-1 vs. SMApt1                 | 0.01462    | -0.1337 to 0.1630  | No           | ns      |
| nDFb-1 vs. SMApt2                 | -0.03652   | -0.1849 to 0.1118  | No           | ns      |
| nDFb-1 vs. SMA0232                | 0.02379    | -0.1246 to 0.1722  | No           | ns      |
| nDFb-1 vs. SMA9677                | 0.07763    | -0.07074 to 0.2260 | No           | ns      |
| nDFb-2 vs. SMApt1                 | 0.003178   | -0.1452 to 0.1515  | No           | ns      |

|                     |          |                       |    |    |
|---------------------|----------|-----------------------|----|----|
| nDFb-2 vs. SMApt2   | -0.04796 | -0.1963 to<br>0.1004  | No | ns |
| nDFb-2 vs. SMA0232  | 0.01235  | -0.1360 to<br>0.1607  | No | ns |
| nDFb-2 vs. SMA9677  | 0.06619  | -0.08218 to<br>0.2145 | No | ns |
| SMApt1 vs. SMApt2   | -0.05114 | -0.1995 to<br>0.09722 | No | ns |
| SMApt1 vs. SMA0232  | 0.009173 | -0.1392 to<br>0.1575  | No | ns |
| SMApt1 vs. SMA9677  | 0.06301  | -0.08535 to<br>0.2114 | No | ns |
| SMApt2 vs. SMA0232  | 0.06031  | -0.08805 to<br>0.2087 | No | ns |
| SMApt2 vs. SMA9677  | 0.1141   | -0.03422 to<br>0.2625 | No | ns |
| SMA0232 vs. SMA9677 | 0.05383  | -0.09453 to<br>0.2022 | No | ns |

**Supplemental Table 4. Relates to Figure 4B:**

Statistical comparisons for IMP1 protein levels for figure 4B. Values for steady state IMP1 levels were assessed using a two way ANOVA and Tukey's multiple comparisons test. Test was conducted with 1 family, 28 comparisons per family and an alpha of .05.  
ns: not significant.

Compare column means (main column effect)

Number of families 1  
 Number of comparisons per family 28  
 Alpha 0.05

| Tukey's multiple comparisons test | Mean Diff. | 95% CI of diff.   | Significant ? | Summary |
|-----------------------------------|------------|-------------------|---------------|---------|
| Ctrl78 vs. Ctrl79                 | 0.03468    | -0.1714 to 0.2408 | No            | ns      |
| Ctrl78 vs. nDFb-1                 | 0.01609    | -0.1900 to 0.2222 | No            | ns      |
| Ctrl78 vs. nDFb-2                 | -0.05117   | -0.2573 to 0.1549 | No            | ns      |
| Ctrl78 vs. SMApt1                 | 0.5046     | 0.2985 to 0.7107  | Yes           | ****    |
| Ctrl78 vs. SMApt2                 | 0.4638     | 0.2681 to 0.6699  | Yes           | ****    |
| Ctrl78 vs. SMA0232                | 0.4742     | 0.2733 to 0.6803  | Yes           | ****    |
| Ctrl78 vs. SMA9677                | 0.4794     | 0.2733 to 0.6855  | Yes           | ****    |
| Ctrl79 vs. nDFb-1                 | -0.01859   | -0.2247 to 0.1875 | No            | ns      |
| Ctrl79 vs. nDFb-2                 | -0.08585   | -0.2920 to 0.1203 | No            | ns      |
| Ctrl79 vs. SMApt1                 | 0.4699     | 0.2638 to 0.6761  | Yes           | ****    |
| Ctrl79 vs. SMApt2                 | 0.4291     | 0.2230 to 0.6353  | Yes           | ****    |
| Ctrl79 vs. SMA0232                | 0.4395     | 0.2334 to 0.6456  | Yes           | ****    |
| Ctrl79 vs. SMA9677                | 0.4447     | 0.2386 to 0.6508  | Yes           | ****    |
| nDFb-1 vs. nDFb-2                 | -0.06727   | -0.2734 to 0.1389 | No            | ns      |
| nDFb-1 vs. SMApt1                 | 0.4885     | 0.2824 to 0.6947  | Yes           | ****    |
| nDFb-1 vs. SMApt2                 | 0.4477     | 0.2416 to 0.6538  | Yes           | ****    |
| nDFb-1 vs. SMA0232                | 0.4581     | 0.2520 to 0.6642  | Yes           | ****    |
| nDFb-1 vs. SMA9677                | 0.4633     | 0.2572 to 0.6694  | Yes           | ****    |
| nDFb-2 vs. SMApt1                 | 0.5558     | 0.3497 to 0.7619  | Yes           | ****    |

|                     |          |                      |     |      |
|---------------------|----------|----------------------|-----|------|
| nDFb-2 vs. SMApt2   | 0.515    | 0.3089 to<br>0.7211  | Yes | **** |
| nDFb-2 vs. SMA0232  | 0.5254   | 0.3193 to<br>0.7315  | Yes | **** |
| nDFb-2 vs. SMA9677  | 0.5306   | 0.3244 to<br>0.7367  | Yes | **** |
| SMApt1 vs. SMApt2   | -0.04081 | -0.2469 to<br>0.1653 | No  | ns   |
| SMApt1 vs. SMA0232  | -0.03042 | -0.2365 to<br>0.1757 | No  | ns   |
| SMApt1 vs. SMA9677  | -0.02524 | -0.2314 to<br>0.1809 | No  | ns   |
| SMApt2 vs. SMA0232  | 0.01039  | -0.1957 to<br>0.2165 | No  | ns   |
| SMApt2 vs. SMA9677  | 0.01557  | -0.1906 to<br>0.2217 | No  | ns   |
| SMA0232 vs. SMA9677 | 0.00517  | -0.2009 to<br>0.2113 | No  | ns   |
|                     | 8        |                      |     |      |



**Supplemental Table 5. Relates to Figure 4B:**

Statistical comparisons for SMN protein levels for figure 4B. Values for steady state SMN levels were assessed using a two way ANOVA and Tukey's multiple comparisons test. Test was conducted with 1 family, 28 comparisons per family and an alpha of .05. ns: not significant. \*:  $p < .05$ , \*\*:  $p < .01$ , \*\*\*:  $p < .001$ , \*\*\*\*:  $p < .0001$ .

**Supplemental Table 6. Relates to Figure 4E:**

Statistical comparisons for IMP1 association with mRNA levels for figure 4E. Values for IMP1 pulldown/IMP1 input were assessed using a two way ANOVA and Tukey's multiple comparisons test. Test was conducted with 1 family, 120 comparisons per family and an alpha of .05. ns: not significant. \*:  $p < .05$ , \*\*:  $p < .01$ , \*\*\*:  $p < .001$ , \*\*\*\*:  $p < .0001$ .

**Supplemental Table 7. Relates to Figure 6D & 6F:**

Statistical comparisons for figure 6D, worksheet 1. IMP1 granule volume values were assessed using a two way ANOVA and Tukey's multiple comparisons test. Test was conducted with 1 family, 28 comparisons per family and an alpha of .05. ns: not significant, \*:  $p < .05$ , \*\*:  $p < .01$ , \*\*\*:  $p < .001$ , \*\*\*\*:  $p < .0001$ . Statistical comparisons for figure 6F, worksheet 2. IMP1 granule volumes after transfection with expression constructs for either mCherry, SMN-mCherry or SMN $\Delta$ tudor-mCherry were assessed using two way ANOVA and Tukey's multiple comparisons test. Test was conducted with 1 family, 66 comparisons per family and an alpha of .05. ns: not significant, \*:  $p < .05$ , \*\*,  $p < .01$ , \*\*\*:  $p < .001$ , \*\*\*\*:  $p < .0001$ .

Compare column means (main column effect)

Number of families 1  
 Number of comparisons per family 28  
 Alpha 0.05

| Tukey's multiple comparisons test | Mean Diff. | 95.00% CI of diff. | Significant? | Summary | Adjusted P Value |
|-----------------------------------|------------|--------------------|--------------|---------|------------------|
| Ctrl78 vs. Ctrl79                 | 116        | -319.6 to 551.6    | No           | ns      | 0.9923           |
| Ctrl78 vs. nDFb-1                 | 1.446      | -434.2 to 437.1    | No           | ns      | >0.9999          |
| Ctrl78 vs. nDFb-2                 | 52.8       | -382.8 to 488.4    | No           | ns      | >0.9999          |
| Ctrl78 vs. SMA0232                | -44.04     | -479.7 to 391.6    | No           | ns      | >0.9999          |
| Ctrl78 vs. SMA9677                | -110.3     | -546 to 325.3      | No           | ns      | 0.9943           |
| Ctrl78 vs. SMApt1                 | -252.6     | -688.2 to 183.1    | No           | ns      | 0.6402           |
| Ctrl78 vs. SMApt2                 | -104.2     | -539.9 to 331.4    | No           | ns      | 0.996            |
| Ctrl79 vs. nDFb-1                 | -114.6     | -550.2 to 321.1    | No           | ns      | 0.9928           |
| Ctrl79 vs. nDFb-2                 | -63.2      | -498.8 to 372.4    | No           | ns      | 0.9998           |
| Ctrl79 vs. SMA0232                | -160       | -595.7 to 275.6    | No           | ns      | 0.9516           |
| Ctrl79 vs. SMA9677                | -226.3     | -662 to 209.3      | No           | ns      | 0.7578           |
| Ctrl79 vs. SMApt1                 | -368.6     | -804.2 to 67.06    | No           | ns      | 0.1661           |
| Ctrl79 vs. SMApt2                 | -220.2     | -655.9 to 215.4    | No           | ns      | 0.7826           |
| nDFb-1 vs. nDFb-2                 | 51.35      | -384.3 to 487      | No           | ns      | >0.9999          |
| nDFb-1 vs. SMA0232                | -45.49     | -481.1 to 390.2    | No           | ns      | >0.9999          |
| nDFb-1 vs. SMA9677                | -111.8     | -547.4 to 323.9    | No           | ns      | 0.9938           |
| nDFb-1 vs. SMApt1                 | -254       | -689.7 to 181.6    | No           | ns      | 0.6334           |
| nDFb-1 vs. SMApt2                 | -105.7     | -541.3 to 330      | No           | ns      | 0.9956           |
| nDFb-2 vs. SMA0232                | -96.84     | -532.5 to 338.8    | No           | ns      | 0.9975           |
| nDFb-2 vs. SMA9677                | -163.1     | -598.8 to 272.5    | No           | ns      | 0.9464           |
| nDFb-2 vs. SMApt1                 | -305.4     | -741 to 130.3      | No           | ns      | 0.3912           |
| nDFb-2 vs. SMApt2                 | -157       | -592.7 to 278.6    | No           | ns      | 0.9562           |
| SMA0232 vs. SMA9677               | -66.29     | -501.9 to 369.3    | No           | ns      | 0.9998           |
| SMA0232 vs. SMApt1                | -208.5     | -644.2 to 227.1    | No           | ns      | 0.8267           |
| SMA0232 vs. SMApt2                | -60.2      | -495.8 to 375.4    | No           | ns      | 0.9999           |
| SMA9677 vs. SMApt1                | -142.3     | -577.9 to 293.4    | No           | ns      | 0.9745           |
| SMA9677 vs. SMApt2                | 6.095      | -429.5 to 441.7    | No           | ns      | >0.9999          |
| SMApt1 vs. SMApt2                 | 148.3      | -287.3 to 584      | No           | ns      | 0.9678           |

**Supplemental Table 8. Relates to Figure 7B:**

Statistical comparisons for figure 7B. IMP1 levels in the lamellipodia were assessed using two way ANOVA and Tukey's multiple comparisons test. Test was conducted with 1 family, 6 comparisons per family and an alpha of .05. ns: not significant, \*,  $p < .05$ , \*\*,  $p < .01$ , \*\*\*,  $p < .001$ , \*\*\*\*:  $p < .0001$ .

Compare column means (main column effect)

Number of families 1  
 Number of comparisons per family 28  
 Alpha 0.05

| Tukey's multiple comparisons test | Mean Diff. | 95.00% CI of diff. | Significant? | Summary | Adjusted P Value |
|-----------------------------------|------------|--------------------|--------------|---------|------------------|
| Ctrl78 vs. Ctrl79                 | 96.75      | -485.4 to 678.9    | No           | ns      | 0.9996           |
| Ctrl78 vs. nDFb-1                 | 123.6      | -458.5 to 705.7    | No           | ns      | 0.9981           |
| Ctrl78 vs. nDFb-2                 | 40.76      | -541.4 to 622.9    | No           | ns      | >0.9999          |
| Ctrl78 vs. SMA0232                | 549        | -33.17 to 1131     | No           | ns      | 0.0806           |
| Ctrl78 vs. SMA9677                | 655.3      | 73.19 to 1237      | Yes          | *       | 0.0154           |
| Ctrl78 vs. SMApt1                 | 550.5      | -31.6 to 1133      | No           | ns      | 0.0789           |
| Ctrl78 vs. SMApt2                 | 457.9      | -124.3 to 1040     | No           | ns      | 0.2443           |
| Ctrl79 vs. nDFb-1                 | 26.83      | -555.3 to 609      | No           | ns      | >0.9999          |
| Ctrl79 vs. nDFb-2                 | -56        | -638.1 to 526.1    | No           | ns      | >0.9999          |
| Ctrl79 vs. SMA0232                | 452.2      | -129.9 to 1034     | No           | ns      | 0.259            |
| Ctrl79 vs. SMA9677                | 558.6      | -23.56 to 1141     | No           | ns      | 0.0705           |
| Ctrl79 vs. SMApt1                 | 453.8      | -128.4 to 1036     | No           | ns      | 0.2549           |
| Ctrl79 vs. SMApt2                 | 361.1      | -221 to 943.3      | No           | ns      | 0.5556           |
| nDFb-1 vs. nDFb-2                 | -82.83     | -665 to 499.3      | No           | ns      | 0.9999           |
| nDFb-1 vs. SMA0232                | 425.4      | -156.8 to 1008     | No           | ns      | 0.336            |
| nDFb-1 vs. SMA9677                | 531.7      | -50.39 to 1114     | No           | ns      | 0.1017           |
| nDFb-1 vs. SMApt1                 | 426.9      | -155.2 to 1009     | No           | ns      | 0.3311           |
| nDFb-1 vs. SMApt2                 | 334.3      | -247.8 to 916.4    | No           | ns      | 0.6516           |
| nDFb-2 vs. SMA0232                | 508.2      | -73.93 to 1090     | No           | ns      | 0.1375           |
| nDFb-2 vs. SMA9677                | 614.6      | 32.43 to 1197      | Yes          | *       | 0.0303           |
| nDFb-2 vs. SMApt1                 | 509.8      | -72.36 to 1092     | No           | ns      | 0.1348           |
| nDFb-2 vs. SMApt2                 | 417.1      | -165 to 999.2      | No           | ns      | 0.3618           |
| SMA0232 vs. SMA9677               | 106.4      | -475.8 to 688.5    | No           | ns      | 0.9993           |
| SMA0232 vs. SMApt1                | 1.571      | -580.6 to 583.7    | No           | ns      | >0.9999          |
| SMA0232 vs. SMApt2                | -91.08     | -673.2 to 491      | No           | ns      | 0.9997           |
| SMA9677 vs. SMApt1                | -104.8     | -686.9 to 477.3    | No           | ns      | 0.9994           |
| SMA9677 vs. SMApt2                | -197.4     | -779.6 to 384.7    | No           | ns      | 0.9685           |
| SMApt1 vs. SMApt2                 | -92.65     | -674.8 to 489.5    | No           | ns      | 0.9997           |

**Supplemental Table 9. Relates to Figure 7C:**

Statistical comparisons for figure 7C. IMP1 levels in the leading edge were assessed using two way ANOVA and Tukey's multiple comparisons test. Test was conducted with 1 family, 6 comparisons per family and an alpha of .05. ns: not significant, \*:  $p < .05$ , \*\*,  $p < .01$ , \*\*\*:  $p < .001$ , \*\*\*\*:  $p < .0001$ .

|                                  |      |
|----------------------------------|------|
| Number of families               | 1    |
| Number of comparisons per family | 6    |
| Alpha                            | 0.05 |

| Tukey's multiple comparisons test | Mean Diff. | 95% CI of diff. | Significant? | Summary |
|-----------------------------------|------------|-----------------|--------------|---------|
| nDFb-1 vs. nDFb-2                 | 0.9786     | -1.717 to 3.674 | No           | ns      |
| nDFb-1 vs. SMApt1                 | 5.77       | 3.075 to 8.465  | Yes          | ****    |
| nDFb-1 vs. SMApt2                 | 5.597      | 2.902 to 8.292  | Yes          | ****    |
| nDFb-2 vs. SMApt1                 | 4.791      | 2.096 to 7.486  | Yes          | ****    |
| nDFb-2 vs. SMApt2                 | 4.619      | 1.923 to 7.314  | Yes          | ***     |
| SMApt1 vs. SMApt2                 | -0.1727    | -2.868 to 2.523 | No           | ns      |



**Supplemental Table 10. Relates to Figure 7E:**

Statistical comparisons for figure 7E. IMP1 granule association with the actin cytoskeleton was assessed using two way ANOVA and Tukey's multiple comparisons test. Test was conducted with 1 family, 6 comparisons per family and an alpha of .05. ns: not significant, \*:  $p < .05$ , \*\*:  $p < .01$ , \*\*\*:  $p < .001$ , \*\*\*\*:  $p < .0001$ .

|                                  |      |
|----------------------------------|------|
| Number of families               | 1    |
| Number of comparisons per family | 6    |
| Alpha                            | 0.05 |

| Tukey's multiple comparisons test | Mean Diff. | 95% CI of diff. | Significant? | Summary |
|-----------------------------------|------------|-----------------|--------------|---------|
| nDFb-1 vs. nDFb-2                 | 0.1362     | -6.724 to 6.996 | No           | ns      |
| nDFb-1 vs. SMApt1                 | 9.296      | 2.437 to 16.16  | Yes          | **      |
| nDFb-1 vs. SMApt2                 | 8.106      | 1.246 to 14.97  | Yes          | *       |
| nDFb-2 vs. SMApt1                 | 9.16       | 2.300 to 16.02  | Yes          | **      |
| nDFb-2 vs. SMApt2                 | 7.969      | 1.110 to 14.83  | Yes          | *       |
| SMApt1 vs. SMApt2                 | -1.191     | -8.051 to 5.669 | No           | ns      |

**Supplemental Table 11. Relates to Figure 7G:**

Statistical comparisons for figure 7G. IMP1 granule association with the microtubule cytoskeleton was assessed using two way ANOVA and Tukey's multiple comparisons test. Test was conducted with 1 family, 6 comparisons per family and an alpha of .05. ns: not significant, \*:  $p < .05$ , \*\*:  $p < .01$ .

**Supplemental Table 12. Relates to Figure 7I:**

Statistical comparisons for figure 7I. Values for IMP1 pellet/IMP1 soluble fraction were assessed using a two way ANOVA and Tukey's multiple comparisons test. Test was conducted with 1 family, 120 comparisons per family and an alpha of .05. ns: not significant, \*:  $p < .05$ , \*\*:  $p < .01$ , \*\*\*:  $p < .001$ , \*\*\*\*:  $p < .0001$ .
